# Supplementary material for: Alpha-Lipoic Acid Ameliorates Radiation-Induced Salivary Gland Injury by Preserving Parasympathetic Innervation in Rats
Source: PubMed Central journal article supplement (PMC7178006; doi:10.3390/ijms21072260), 2020-03-25
Supplement: ijms-21-02260-s001.pdf [file ijms-21-02260-s001.pdf]

Supplementary:

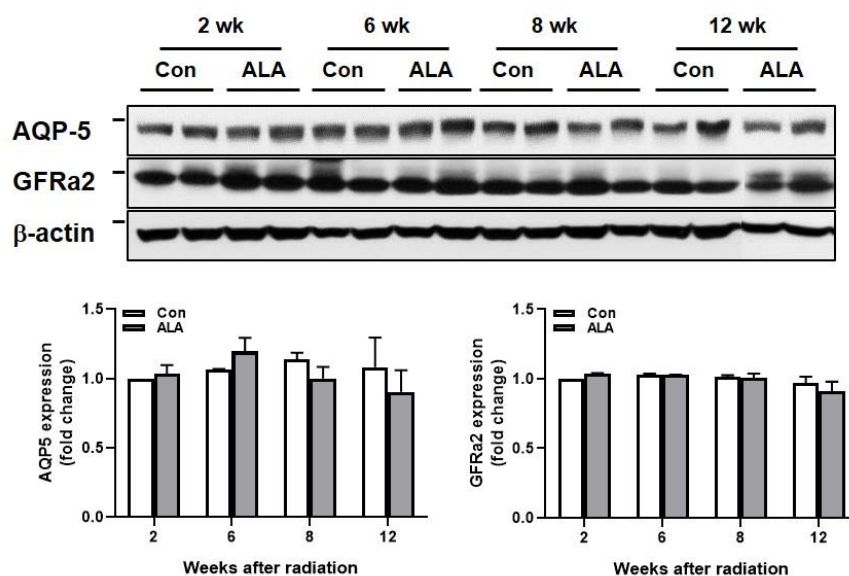

**Supplementary Figure 1.** Salivary gland expression of AQP5 and GFRa2 in 2, 6, 8, and 12 weeks after radiation.  $\beta$ -actin was used as the loading control. Western blots for the expression of AQP5 and GFRa2 are normalized to  $\beta$ -actin and the expression was shown as signal intensity. Figures are representative in each group. Size markers mean 37, 50, and 50 kDa from upper. Con; control ( $n = 3$  per lane). ALA; ALA only treated group ( $n = 3$  per lane). Data were presented as mean $\pm$ SEM ( $*p < 0.05$ ).
